# Supplementary material for: Low-cost composite film triboelectric nanogenerators for a self-powered touch sensor
Source: Royal Society of Chemistry journal article supplement (doi:10.1039/d2nr05962b), 2023-01-01
Supplement: d2nr05962b1.pdf [file d2nr05962b1.pdf]

## Supplementary Information

### Low-cost composite films triboelectric nanogenerator for self-powered touch sensor

Jie-Cheng Fan, Xin-Gui Tang\*, Qi-Jun Sun, Yan-Ping Jiang, Wen-Hua Li, and Qiu-Xiang Liu

School of Physics and Optoelectronic Engineering, Guangdong University of Technology, Guangzhou Higher Education Mega Centre, Guangzhou, 510006, China

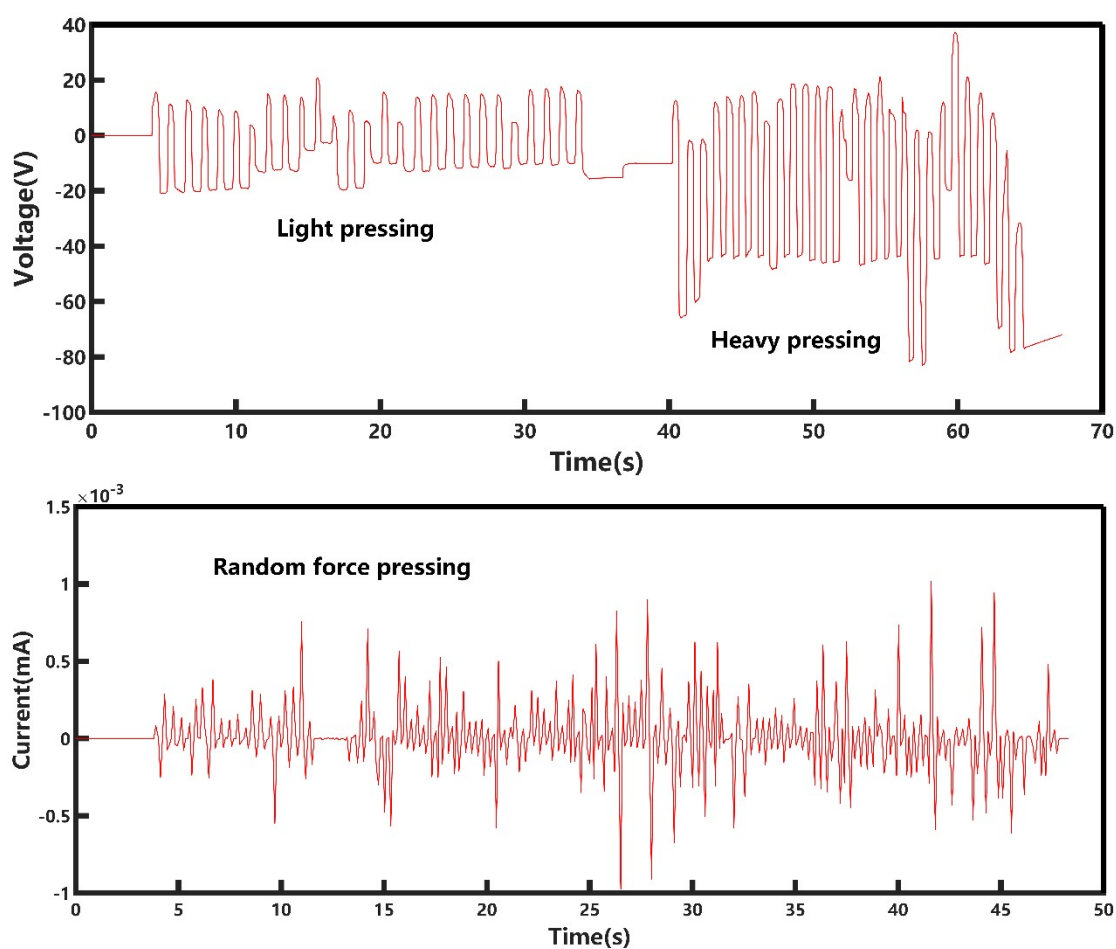

**Fig. S 1** When pressed by hand with different forces, the output open circuit voltage and short circuit current (Testing by Keithley 2400).

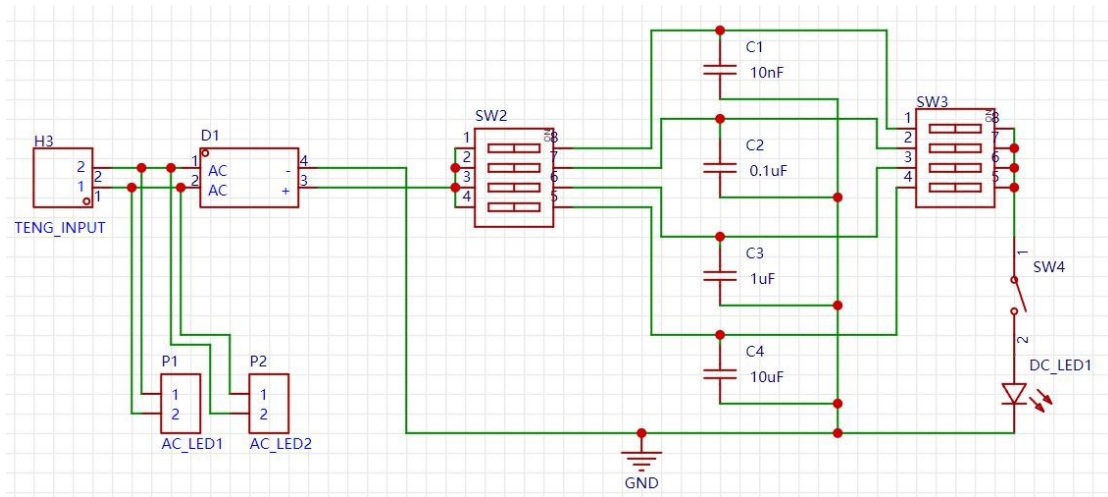

**Fig. S 2** The circuit schematic of lighting LEDs.

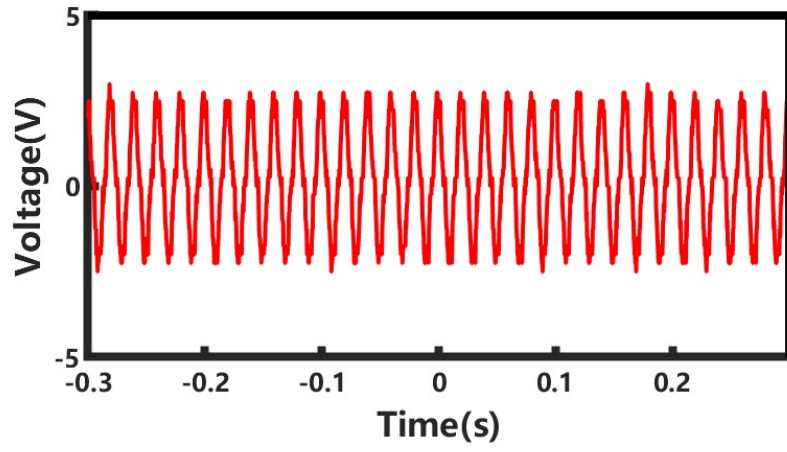

Fig. S 3 The waveform of power noise.

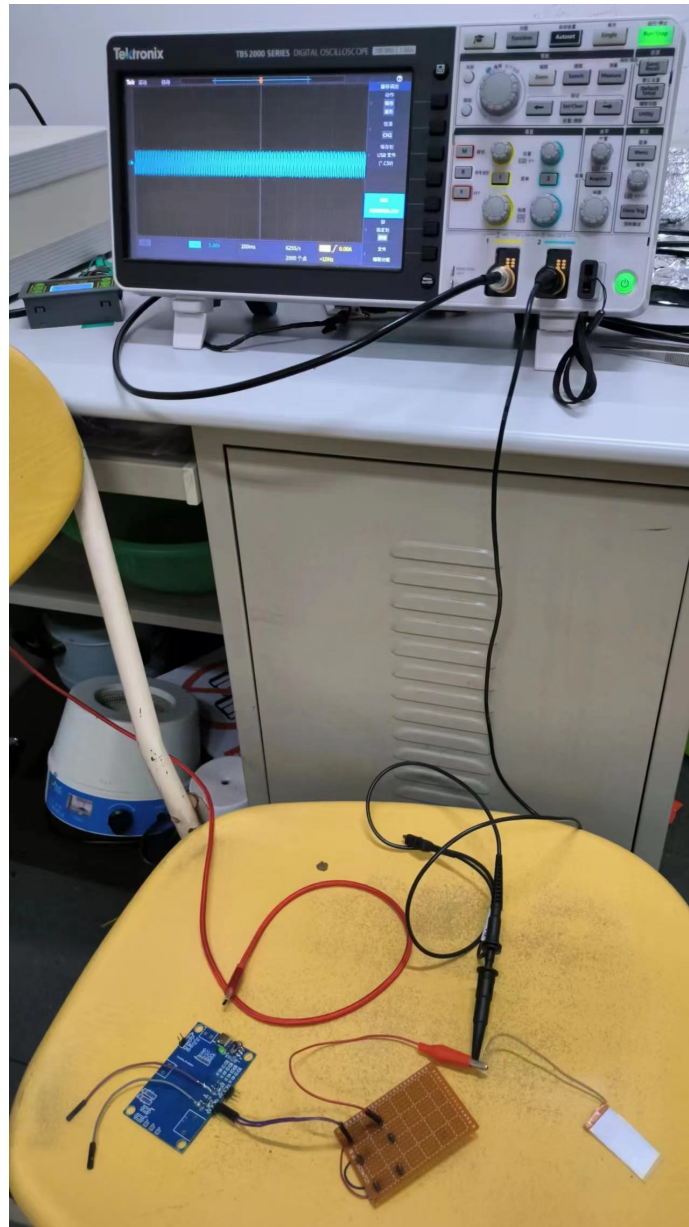

**Fig. S 4** The photograph of the oscilloscope detects the power noise.

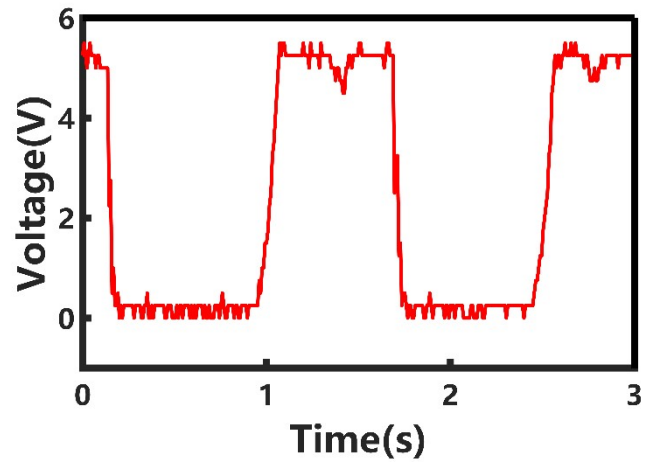

Fig. S 5 The output waveform of circuit shows in Fig. 7c. ii.

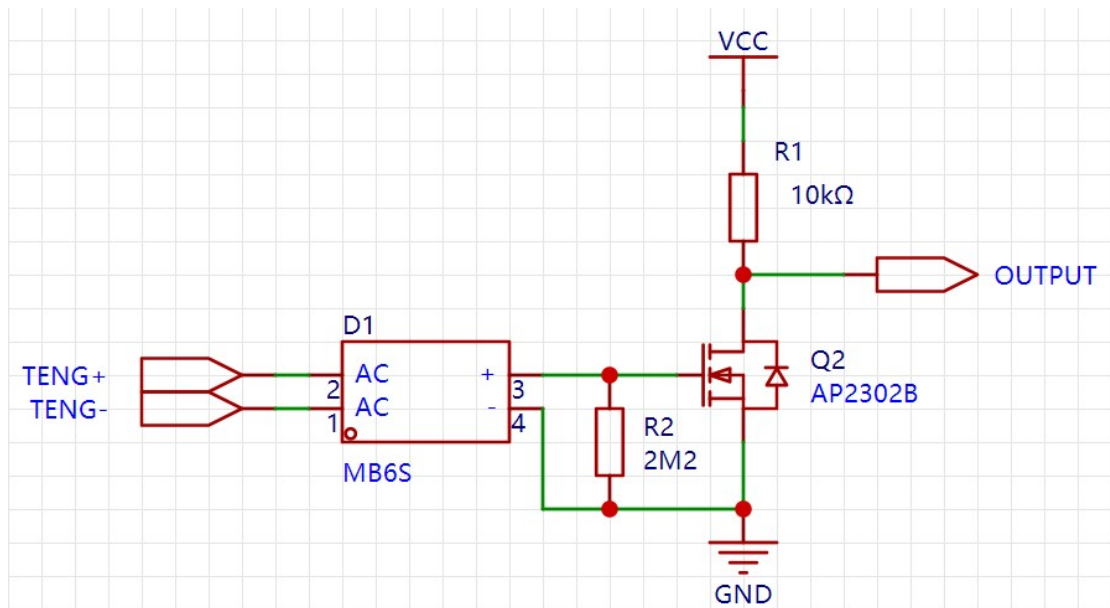

**Fig. S 6** Circuit schematic diagram of converting TENG's AC signal into negative pulse. Two input ports actually use only one.
